# Supplementary material for: Rtapas: An R package to assess cophylogenetic signal between two evolutionary histories
Source: bioRxiv or medRxiv preprint supplement (doi:10.1101/2022.05.17.492291), 2022-05-19
Supplement: Supplementary file [file media-1.pdf]

1 SUPPLEMENTARY MATERIAL

2 **Rtapas: An R package to assess cophylogenetic signal between two**  
3 **evolutionary histories**

4 Mar Llberia-Robledillo<sup>1\*</sup>, J. Ignacio Lucas-Lledó<sup>1</sup>, Oscar Alejandro Pérez-Escobar<sup>2</sup>, Boris R.  
5 Krasnov<sup>3</sup>, Juan Antonio Balbuena<sup>1</sup>

6 <sup>1</sup> Cavanilles Institute of Biodiversity and Evolutionary Biology, University of Valencia, PO Box  
7 22085, ES-46071 Valencia, Spain

8 <sup>2</sup> Royal Botanic Gardens, Kew, Richmond TW9 3AB, UK.

9 <sup>3</sup> Mitrani Department of Desert Ecology, Swiss Institute of Dryland Environmental and Energy  
10 Research, Jacob Blaustein Institutes for Desert Research, Ben-Gurion University of the Negev,  
11 Sede Boqer Campus, 84990, Midreshet Ben-Gurion, Israel.

12 Corresponding author: M. Llberia-Robledillo (mar.llberia@uv.es)

13

14

15 **Trematode and its amphipod host (Overview example)**

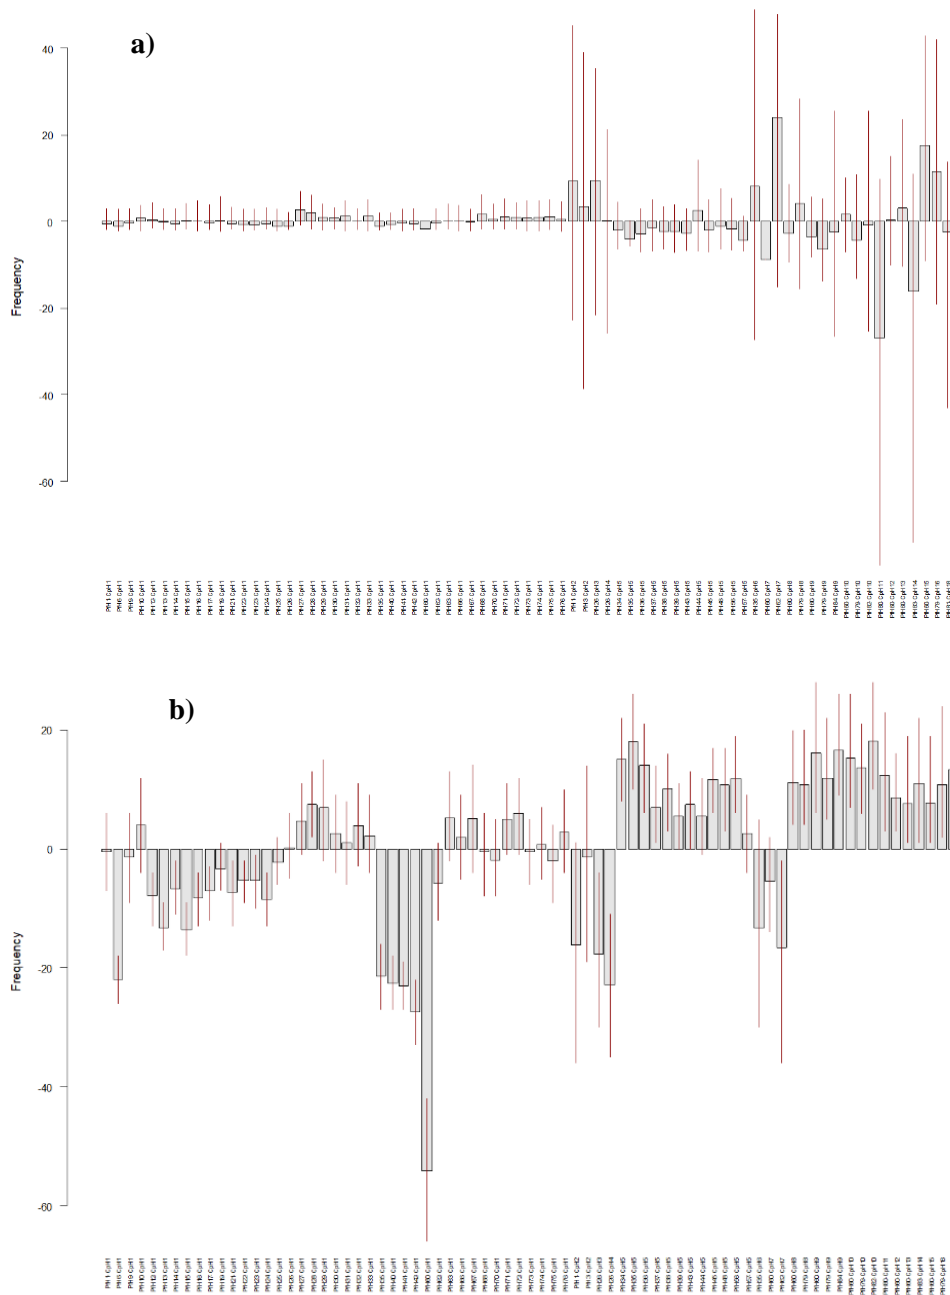

16

17 Figure S1. Average of (a) residual frequency distributions (observed – expected frequencies) for  
 18 maximizing congruence algorithm, and (b) corrected frequency distributions for maximizing incongruence  
 19 algorithm of host-symbiont associations of trematode and amphipod. Both algorithms were applied with  
 20 PACo. Vertical lines represent 95% confidence intervals of the residual and corrected frequencies computed  
 21 empirically with 1,000 randomly chosen pairs of posterior probability trees.

22 **Nuclear and plastid DNA data from orchids (Case Study 1)**

23 This corresponds to the dataset of first case study in the manuscript. Here we provide the  
24 tanglegrams of the phylogenies corresponding to nuclear and plastid loci of orchids, obtained with  
25 the results of the frequencies presented in Figure 5 of the manuscript.

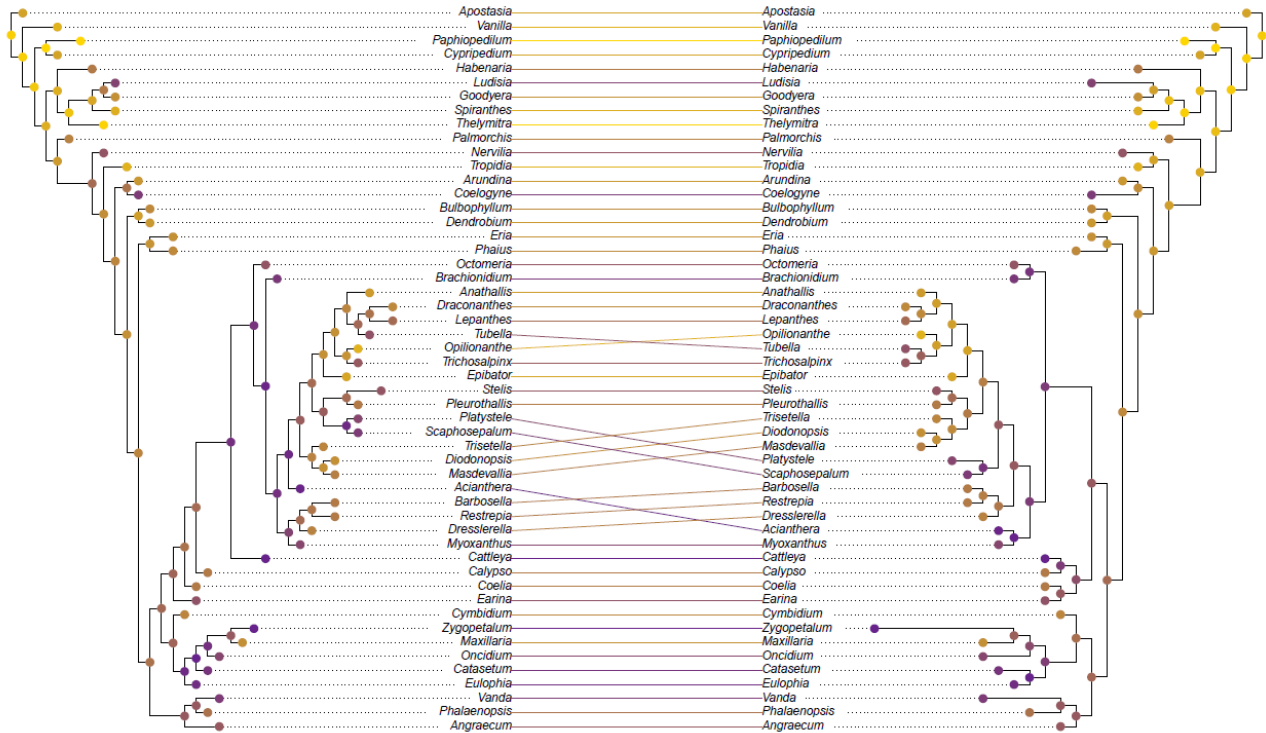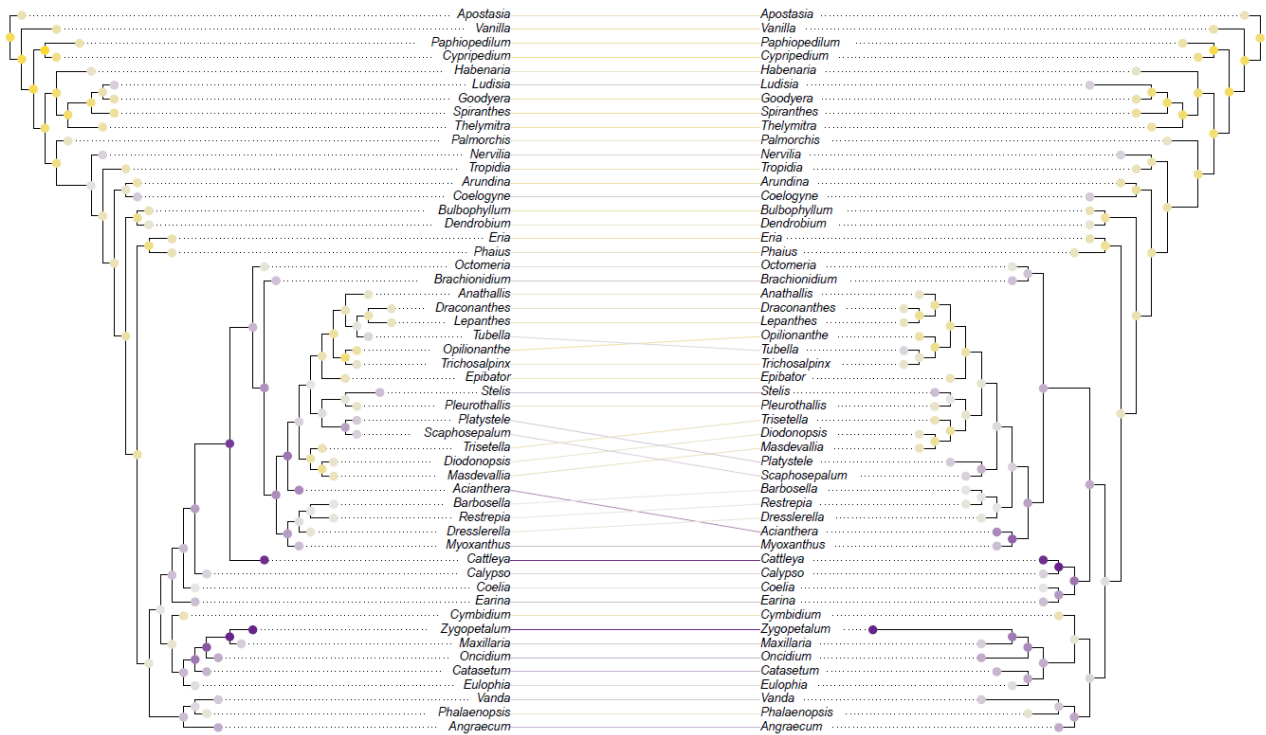

26 Figure S2. Tanglegrams representing the associations between organellar and nuclear DNA data  
27 from orchids. a) Displays the frequency corresponding to each plastid-nuclear association obtained with  
28 the algorithm to maximize congruence and b) displays the corrected frequency corresponding to each each  
29 plastid-nuclear association obtained with the algorithm to maximize incongruence. Both algorithms were  
30 applied with PACo. In a) the frequencies observed are mapped using a color ranging from the violet  
31 (minimum/incongruent) to gold (maximum/congruent). In b) the frequencies are centered at gray (zero)  
32 ranging from dark violet (lowest/incongruent) to gold (highest/congruent). The average frequency of  
33 occurrence of each terminal and fast maximum likelihood estimators of ancestral states of each node are  
34 also mapped according to the same scale, respectively.

### 35 **Small mammals and their flea parasites (Case Study 2)**

36 Rtapas can be applied to unravel complex patterns in large phylogenies. Can be used to  
37 observe generalized differences between several clades and, then, deepen the analysis within  
38 them. Here we break down the large phylogeny displayed in Figure 6 of the manuscript into three  
39 main clades (Eulipothyphla, Lagomorpha and Rodentia). This is achieved by trimming the  
40 association matrix with those species belonging to a given clade. Then we adjust the trees to match  
41 with the matrix (as seen in the following lines of code). Note that this is the procedure we follow,  
42 but other options are available. Once the data is trimmed, we apply the algorithm obtaining the  
43 residual and corrected frequencies, and displaying them as a heatmap in the tanglegrams. This  
44 dataset does not include posterior probabilistic trees, so we apply the algorithm without  
45 calculating the phylogenetic uncertainty. Even so, we believe that this analysis provides relevant  
46 information to interpret the ecological and speciation patterns of this system.

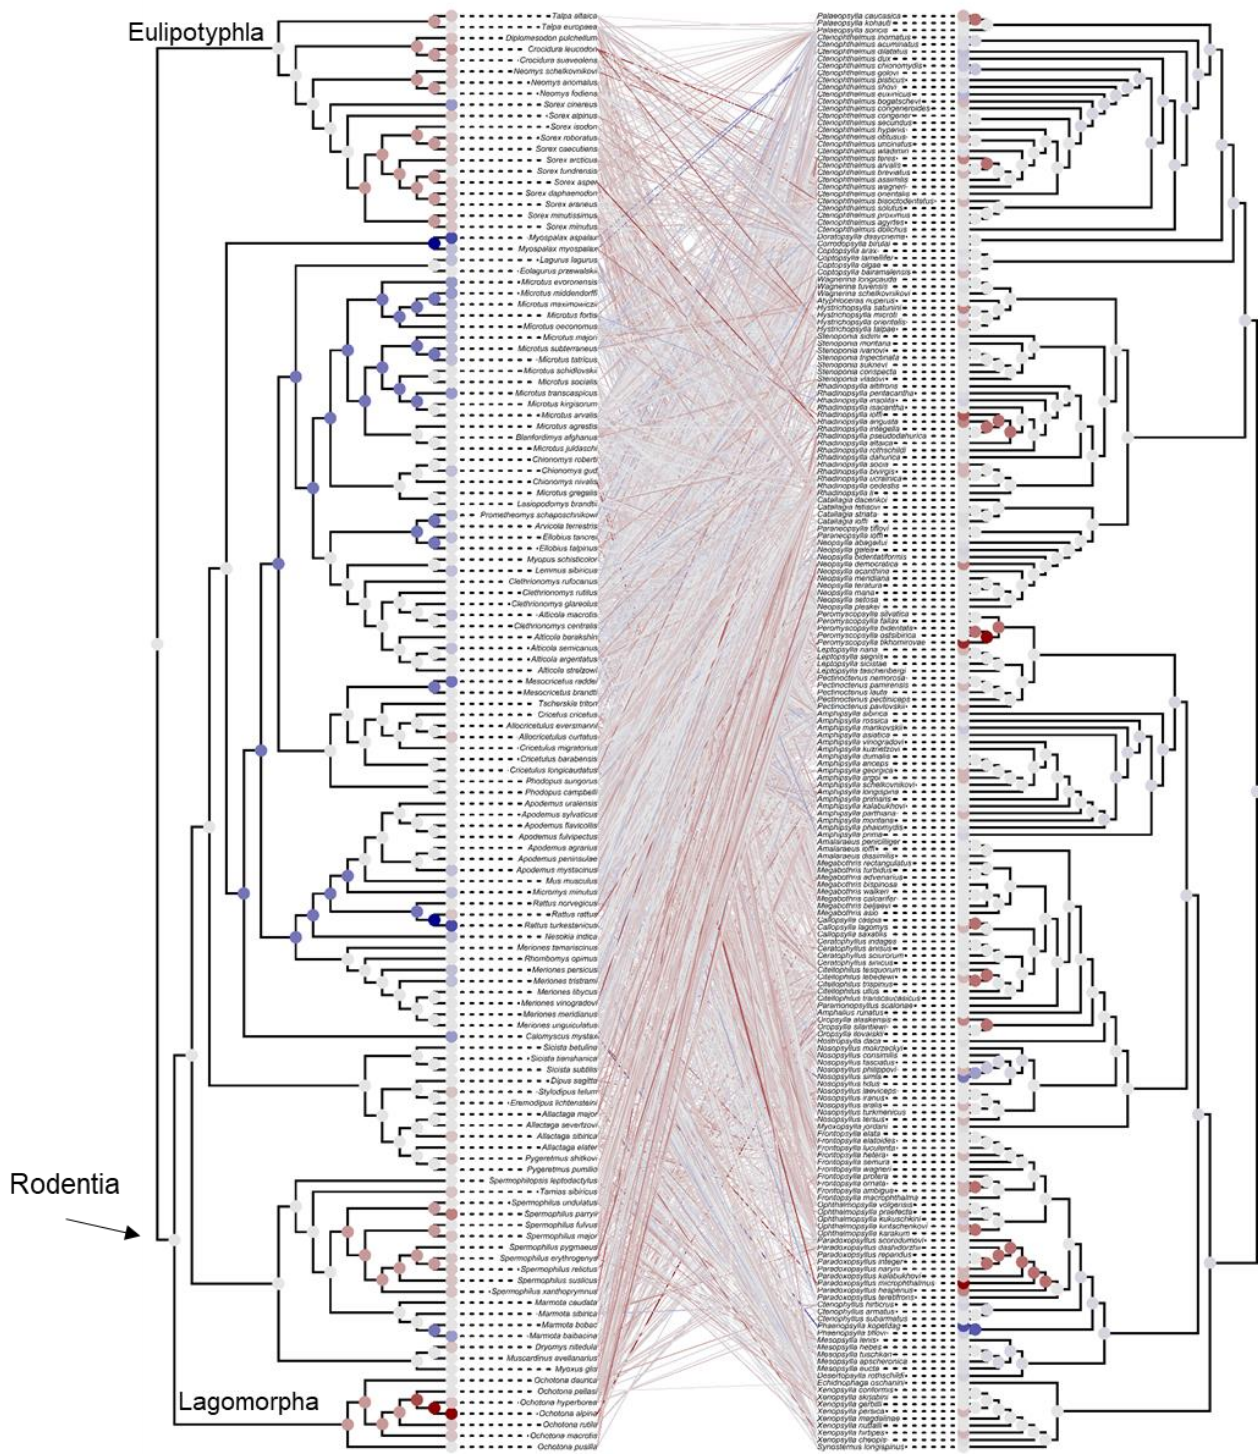

47 Figure S3. Tanglegram representing the associations between the mammal species with their flea parasite  
 48 species with the algorithm to maximize congruence using PACo. The residual frequency (observed –  
 49 expected) corresponding to each mammal–flea association obtained are mapped using a colour scale centred  
 50 at light grey (zero) ranging from dark red (lowest/incongruent) to dark blue (highest/congruent). The  
 51 average residual frequency of occurrence of each terminal and fast maximum likelihood estimators of  
 52 ancestral states of each node are also mapped according to the same scale.



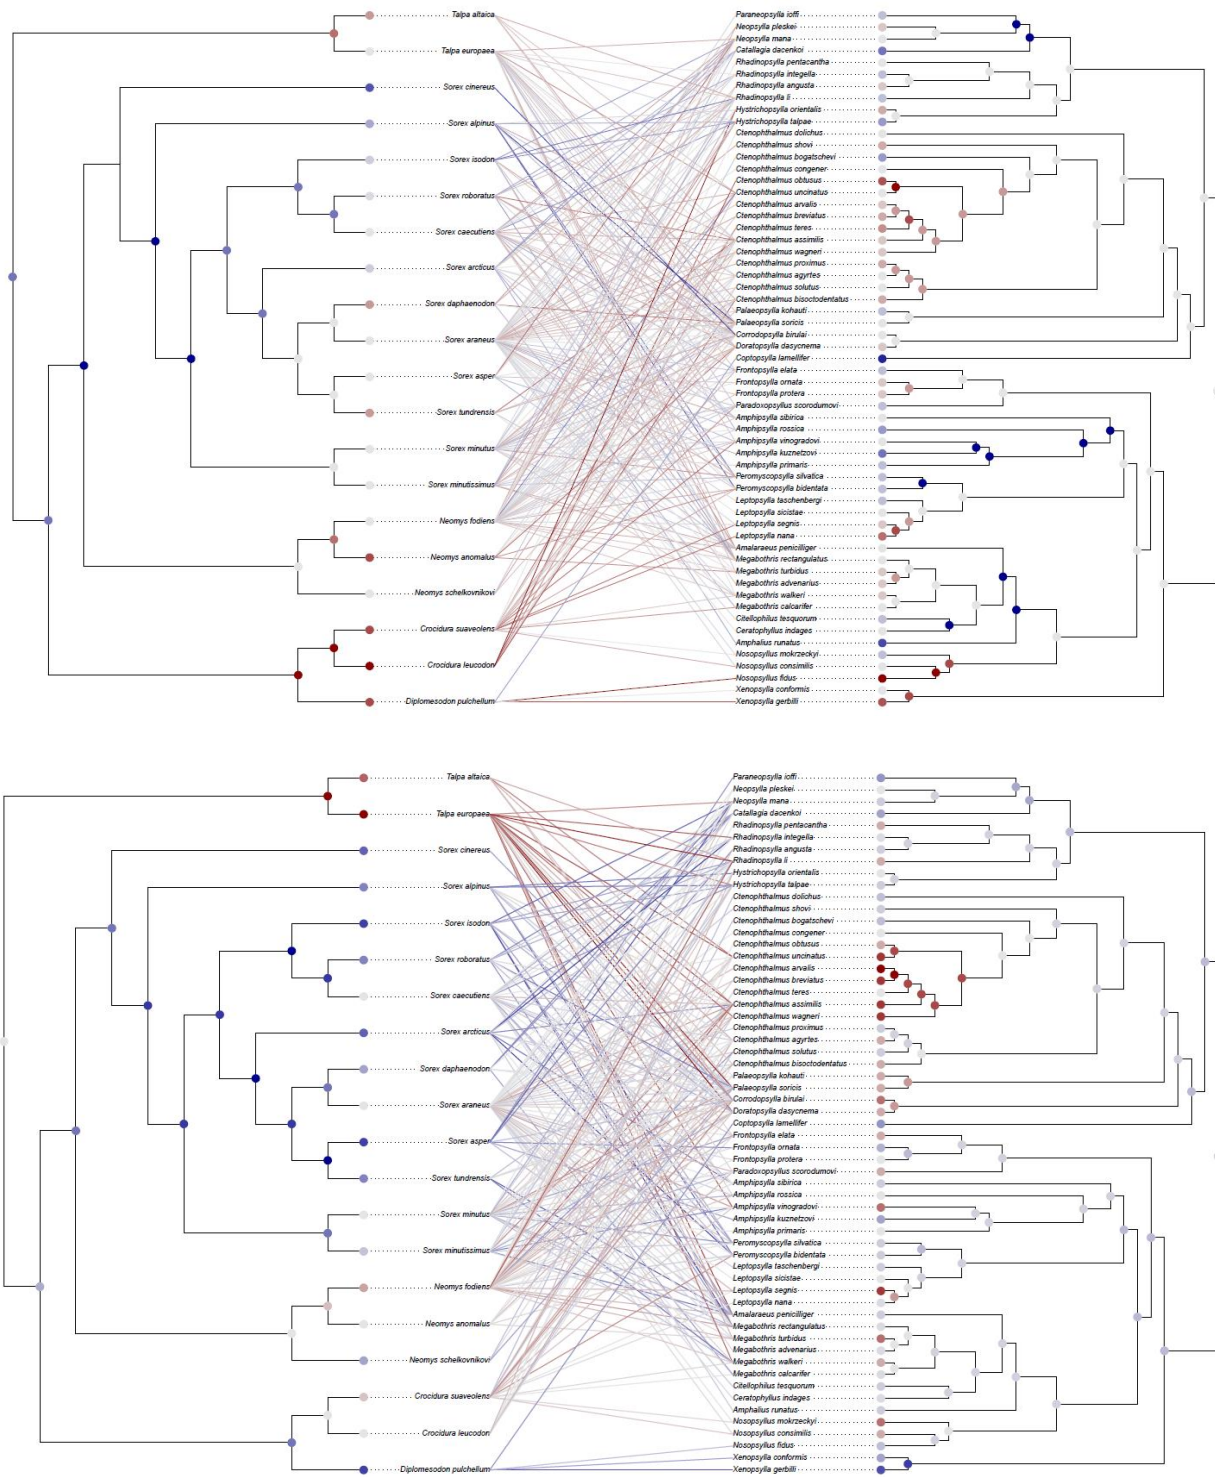

53 Figure S4. Tanglegrams representing the associations between mammals of the Eulipotyphla clade with  
 54 their flea parasite species. a) Displays the residual frequency corresponding to each mammal-flea  
 55 association obtained with the algorithm to maximize congruence and b) displays the corrected frequency  
 56 corresponding to each mammal-flea association obtained with the algorithm to maximize incongruence.  
 57 Both algorithms were applied with PACo. The frequencies are mapped using a color scale centered at light  
 58 gray (zero) ranging from dark red (lowest/incongruent) to dark blue (highest/congruent). The average  
 59 residual frequency of occurrence of each terminal and fast maximum likelihood estimators of ancestral  
 60 states of each node are also mapped according to the same scale.

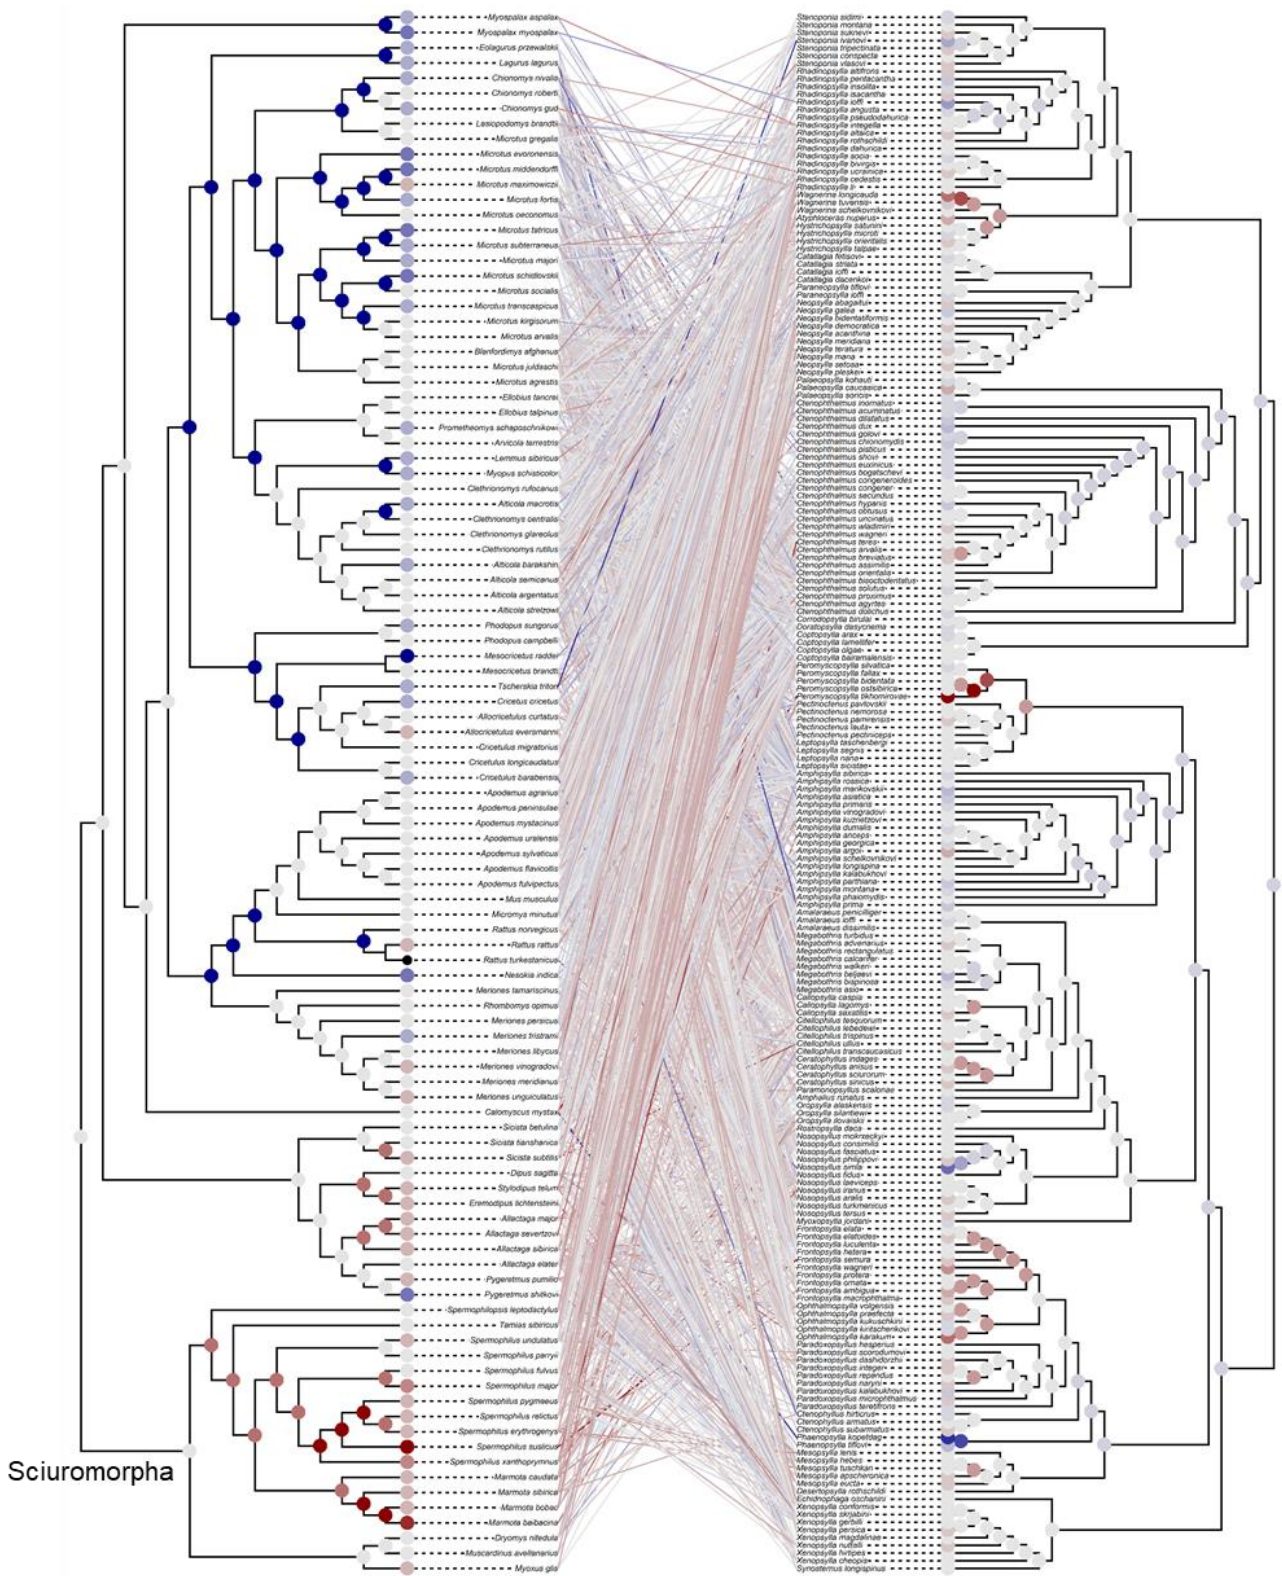

61 Figure S5a. Tanglegram representing the associations between mammals of the Rodentia clade with their  
 62 flea parasite species with the algorithm to maximize congruence using PACo. The residual frequency  
 63 (observed – expected) corresponding to each mammal–flea association obtained are mapped using a color  
 64 scale centered at light gray (zero) ranging from dark red (lowest/incongruent) to dark blue  
 65 (highest/congruent). The average residual frequency of occurrence of each terminal and fast maximum  
 66 likelihood estimators of ancestral states of each node are also mapped according to the same scale.



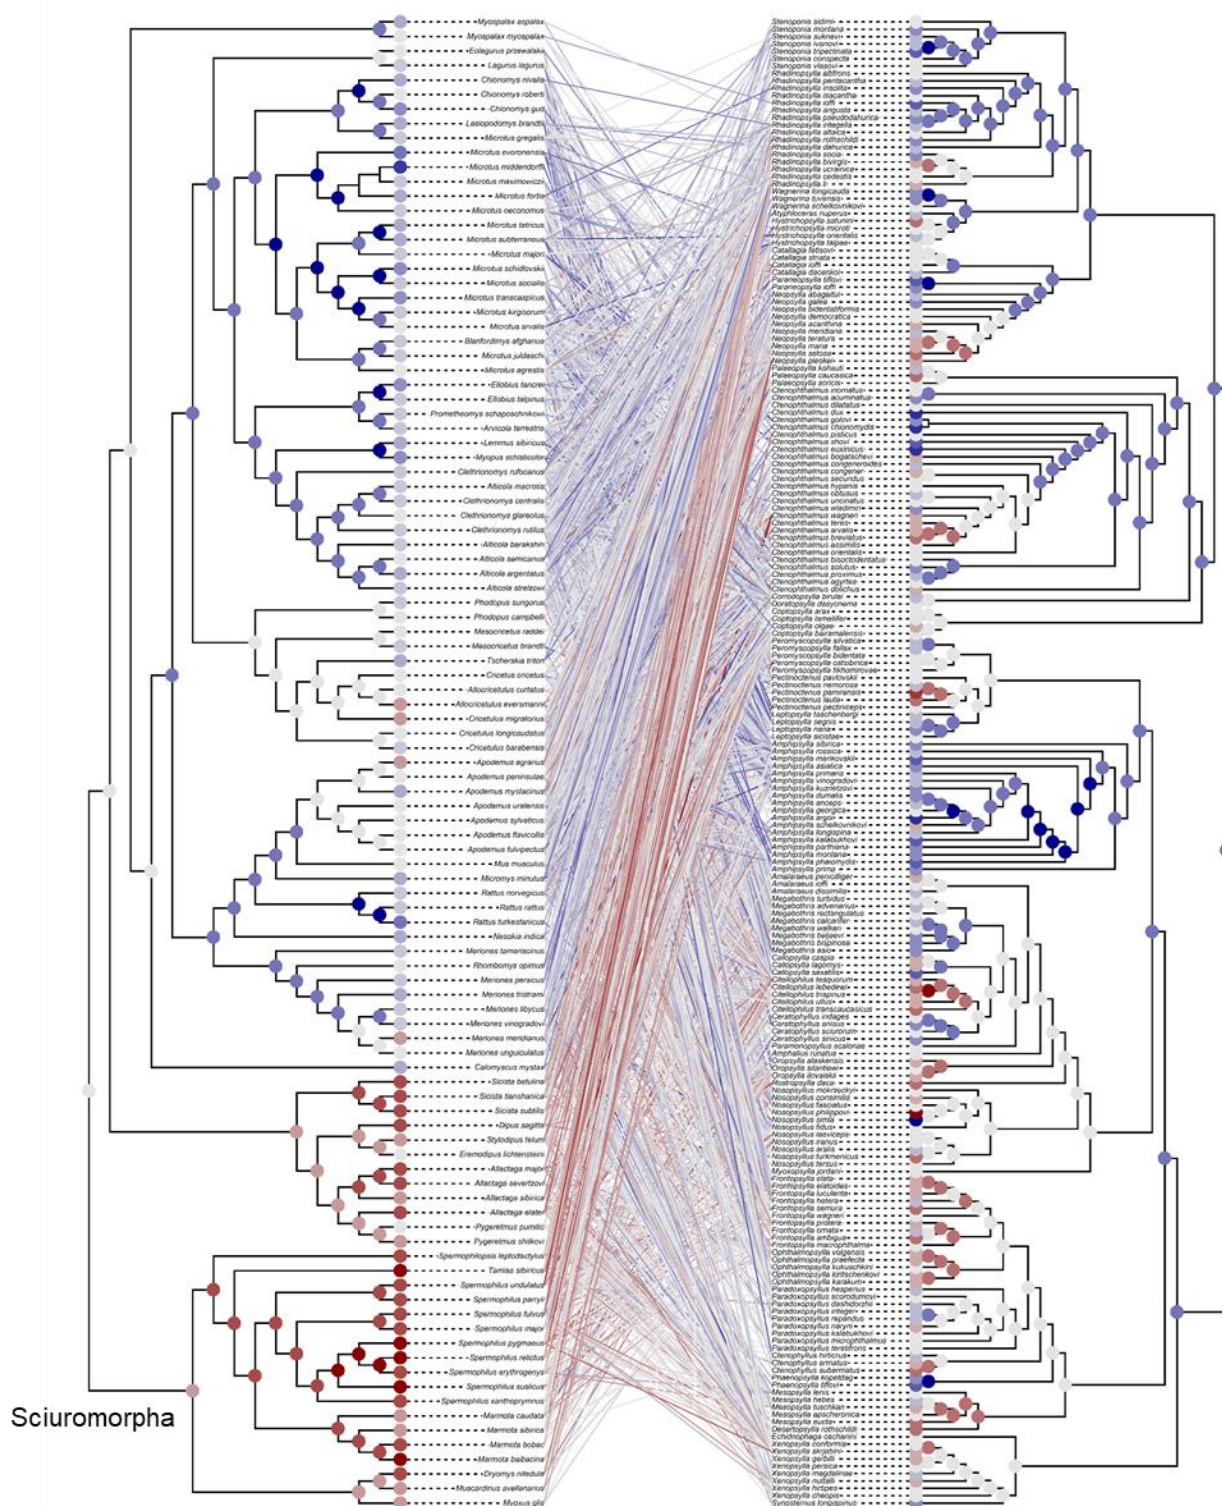

67 Figure S5b. Tanglegram representing the associations between mammals of the Rodentia clade with their  
 68 flea parasite species with the algorithm to maximize incongruence using PACo. The corrected frequencies  
 69 corresponding to each mammal-flea association obtained are mapped using a color scale centered at light  
 70 gray (zero) ranging from dark red (lowest/incongruent) to dark blue (highest/congruent). The average



71 residual frequency of occurrence of each terminal and fast maximum likelihood estimators of ancestral  
 72 states of each node are also mapped according to the same scale.

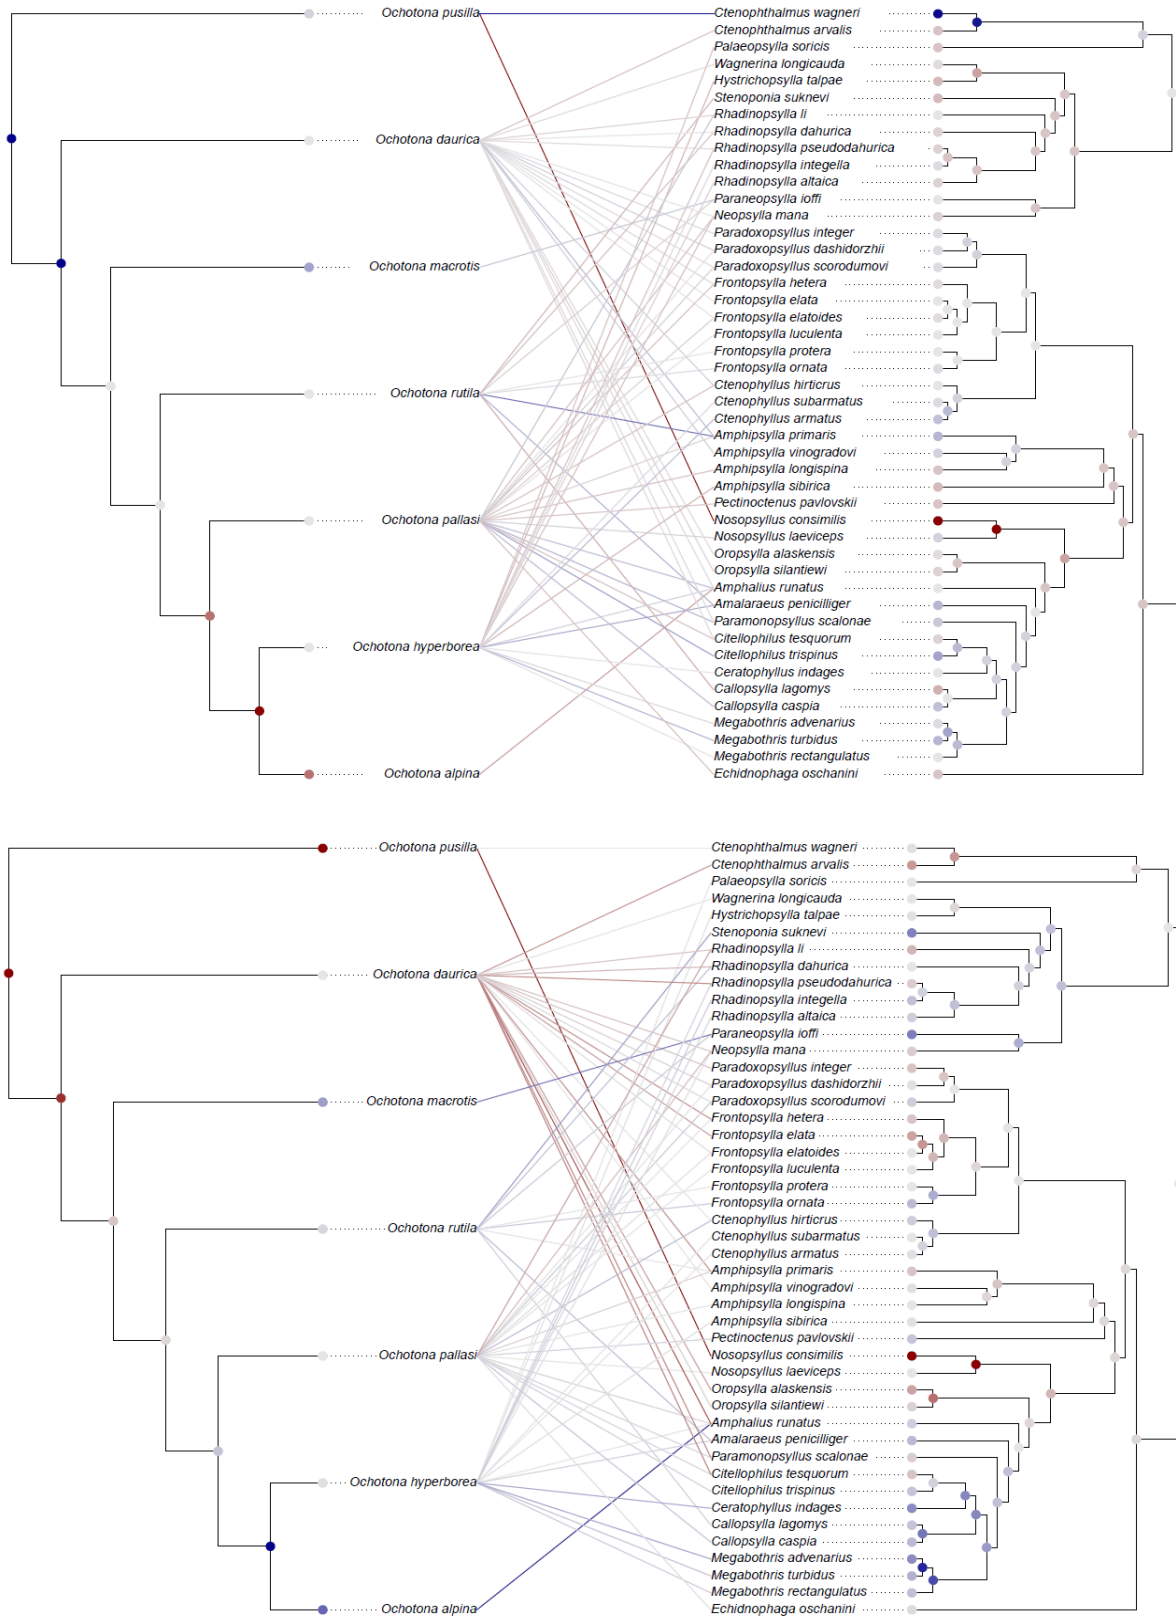

73 Figure S6. Tanglegrams representing the associations between mammals of the Lagomorpha clade with  
 74 their flea parasite species. a) Displays the residual frequency corresponding to each trematode-amphipod

75 association obtained with the algorithm to maximize congruence and b) displays the corrected frequency  
76 corresponding to each trematode-amphipod association obtained with the algorithm to maximize  
77 incongruence. Both algorithms were applied with PACo. The frequencies are mapped using a color scale  
78 centered at light gray (zero) ranging from dark red (lowest/incongruent) to dark blue (highest/congruent).  
79 The average residual frequency of occurrence of each terminal and fast maximum likelihood estimators of  
80 ancestral states of each node are also mapped according to the same scale.

81

82
